# Supplementary material for: Chemically modified biopolymer as an eco-friendly corrosion inhibitor for mild steel in a neutral chloride environment
Source: Royal Society of Chemistry journal article supplement (doi:10.1039/c7nj00553a), 2017-01-01
Supplement: c7nj00553a1.pdf [file c7nj00553a1.pdf]

Electronic Supplementary Information

## Chemically modified biopolymer as an eco-friendly corrosion inhibitor for mild steel in neutral chloride environment.

Vimal Kumar K., B. V. Appa Rao\*.

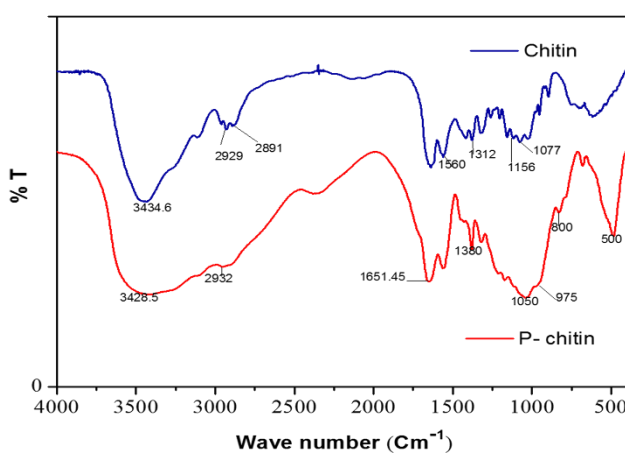

Figure S1. FTIR spectra of chitin (CTN) and Phosphorylated chitin (PCT)

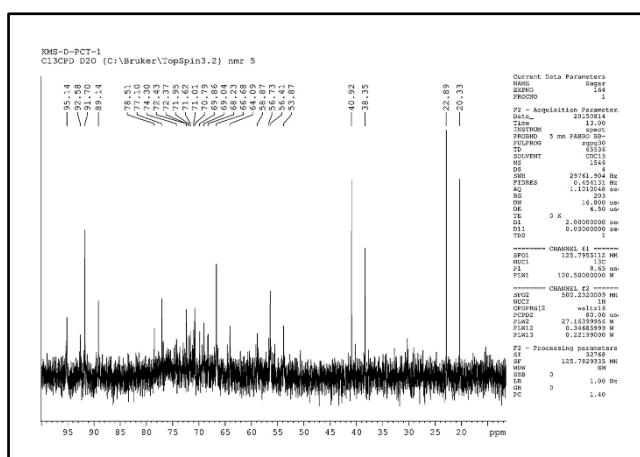

Figure S2. <sup>13</sup>C- NMR spectrum of Phosphorylated chitin (P-CTN).

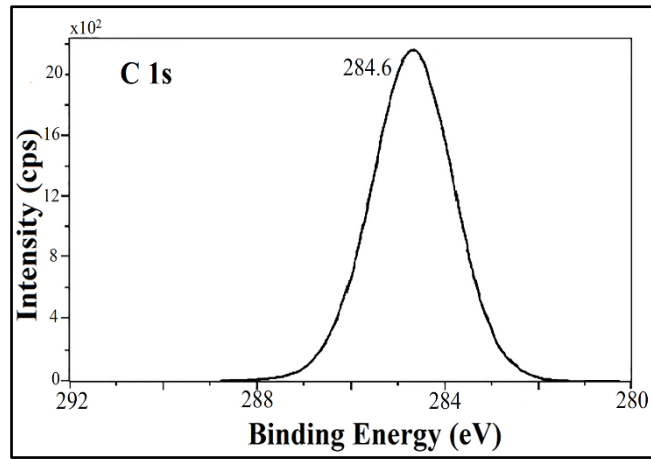

**Figure S3:** XPS deconvolution spectrum of C 1s for mild steels sample immersed in control.

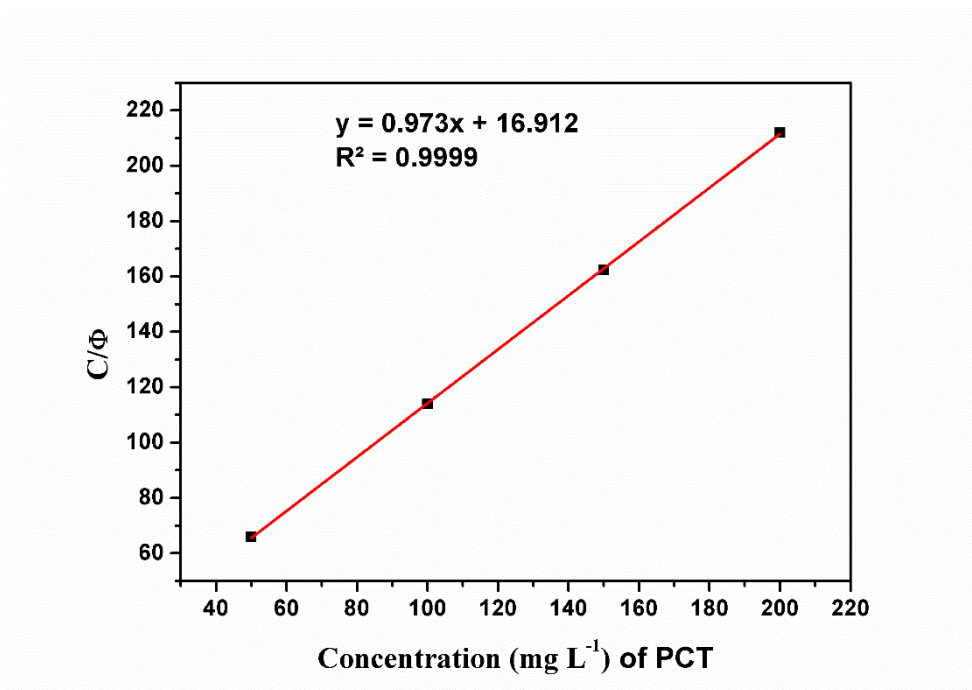

**Figure S4:** Langmuir Adsorption Isotherm
